# Supplementary figures and images for: Low-energy constraints on photoelectron spectra measured from liquid water and aqueous solutions
Source: Royal Society of Chemistry journal article supplement (doi:10.1039/d1cp00430a), 2021-01-01

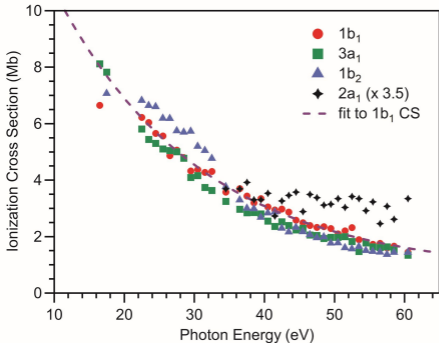

Supplement: d1cp00430a4.pdf [file d1cp00430a4.pdf]

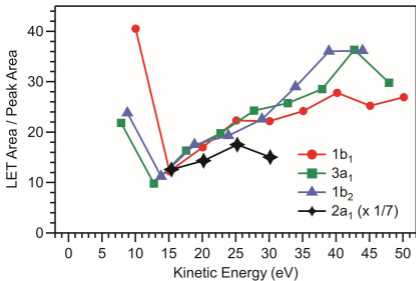

Supplement: d1cp00430a6.pdf [file d1cp00430a6.pdf]

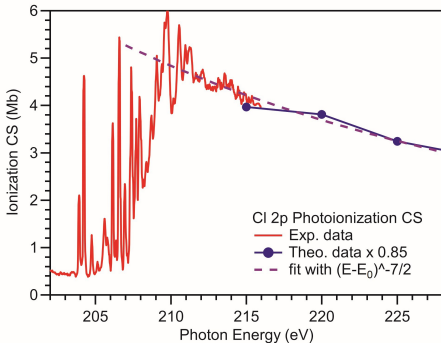

Supplement: d1cp00430a8.pdf [file d1cp00430a8.pdf]

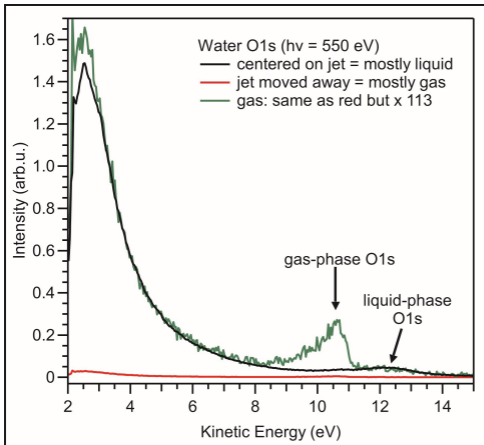

Supplement: d1cp00430a9.pdf [file d1cp00430a9.pdf]
